# Supplementary material for: Incidental Statin Use and the Risk of Stroke or Transient Ischemic Attack after Radiotherapy for Head and Neck Cancer
Source: PubMed Central journal article supplement — J Stroke. 2018 Jan 31;20(1):71–9. doi: 10.5853/jos.2017.01802 (PMC5836583; doi:10.5853/jos.2017.01802), 2018-01-31
Supplement: jos-2017-01802-suppl1.pdf [file jos-2017-01802-suppl1.pdf]

**Supplementary Table 1.** Risk of cerebrovascular events following neck radiotherapy using a multivariable Cox regression model for those treated with <70 Gy

| Variable     | HR (95% CI)      | Chi-square | P      |
|--------------|------------------|------------|--------|
| Statin use   | 0.39 (0.15–1.02) | 3.66       | 0.056  |
| Age          | 1.05 (1.03–1.08) | 16.21      | <0.001 |
| Male sex     | 1.06 (0.54–2.08) | 0.03       | 0.855  |
| Hypertension | 0.99 (0.52–1.92) | <0.01      | 0.987  |
| Diabetes     | 0.91 (0.31–2.65) | 0.03       | 0.862  |
| Prior CAD    | 1.13 (0.34–3.73) | 0.04       | 0.839  |
| Prior CVE    | 1.55 (0.51–4.73) | 0.60       | 0.438  |
| Dyslipidemia | 0.66 (0.26–1.69) | 0.74       | 0.389  |
| Smoking*     | 1.33 (0.86–2.07) | 1.67       | 0.196  |

HR, hazard ratio; CI, confidence interval; CAD, coronary artery disease; CVE, cerebrovascular event.

\*Smoking: active or prior smoking.
