# Supplementary material for: Incidental Statin Use and the Risk of Stroke or Transient Ischemic Attack after Radiotherapy for Head and Neck Cancer
Source: PubMed Central journal article supplement — J Stroke. 2018 Jan 31;20(1):71–9. doi: 10.5853/jos.2017.01802 (PMC5836583; doi:10.5853/jos.2017.01802), 2018-01-31
Supplement: jos-2017-01802-suppl2.pdf [file jos-2017-01802-suppl2.pdf]

**Supplementary Table 2.** Risk of cerebrovascular events following neck radiotherapy using a multivariable Cox regression model for those treated with  $\geq 70$  Gy

| Variable     | HR (95% CI)      | Chi-square | P     |
|--------------|------------------|------------|-------|
| Statin use   | 0.44 (0.19–1.03) | 3.55       | 0.059 |
| Age          | 1.03 (1.01–1.06) | 6.18       | 0.013 |
| Male sex     | 0.86 (0.47–1.56) | 0.25       | 0.620 |
| Hypertension | 1.82 (1.03–3.22) | 4.29       | 0.038 |
| Diabetes     | 0.65 (0.25–1.67) | 0.80       | 0.371 |
| Prior CAD    | 0.90 (0.34–2.38) | 0.05       | 0.828 |
| Prior CVE    | 1.17 (0.36–3.86) | 0.07       | 0.792 |
| Dyslipidemia | 0.80 (0.36–1.79) | 0.28       | 0.803 |
| Smoking*     | 1.12 (0.77–1.64) | 0.37       | 1.124 |

HR, hazard ratio; CI, confidence interval; CAD, coronary artery disease; CVE, cerebrovascular event.

\*Smoking: active or prior smoking.
