# Supplementary material for: Incidental Statin Use and the Risk of Stroke or Transient Ischemic Attack after Radiotherapy for Head and Neck Cancer
Source: PubMed Central journal article supplement — J Stroke. 2018 Jan 31;20(1):71–9. doi: 10.5853/jos.2017.01802 (PMC5836583; doi:10.5853/jos.2017.01802), 2018-01-31
Supplement: jos-2017-01802-suppl3.pdf [file jos-2017-01802-suppl3.pdf]

**Supplementary Table 3.** Risk of cerebrovascular events following neck radiotherapy using a multivariable Cox regression model including other stroke reduction medications

| Variable                                          | HR (95% CI)      | Chi-square | P      |
|---------------------------------------------------|------------------|------------|--------|
| Statin use                                        | 0.41 (0.21–0.79) | 6.99       | 0.008  |
| Age                                               | 1.04 (1.02–1.06) | 22.84      | <0.001 |
| Male sex                                          | 0.90 (0.58–1.39) | 0.24       | 0.627  |
| Hypertension                                      | 1.38 (0.90–2.11) | 2.25       | 0.133  |
| Diabetes                                          | 1.09 (0.57–2.08) | 0.07       | 0.793  |
| Prior CAD                                         | 1.07 (0.50–2.23) | 0.02       | 0.891  |
| Prior CVE                                         | 1.60 (0.72–3.57) | 1.35       | 0.246  |
| Dyslipidemia                                      | 0.73 (0.39–1.37) | 0.95       | 0.329  |
| Smoking*                                          | 1.17 (0.88–1.55) | 1.21       | 0.270  |
| Radiation dose                                    | 1.0 (1.0)        | 1.03       | 0.310  |
| Anti-platelet & Anti-thrombotic meds <sup>†</sup> | 0.90 (0.36–2.28) | 0.05       | 0.832  |

HR, hazard ratio; CI, confidence interval; CAD, coronary artery disease; CVE, cerebrovascular event.

\*Smoking: active or prior smoking; <sup>†</sup>Anti-ischemic meds: Aspirin and/or Plavix and/or Coumadin.
