# Supplementary material for: Incidental Statin Use and the Risk of Stroke or Transient Ischemic Attack after Radiotherapy for Head and Neck Cancer
Source: PubMed Central journal article supplement — J Stroke. 2018 Jan 31;20(1):71–9. doi: 10.5853/jos.2017.01802 (PMC5836583; doi:10.5853/jos.2017.01802), 2018-01-31
Supplement: jos-2017-01802-suppl4.pdf [file jos-2017-01802-suppl4.pdf]

**Supplementary Table 4.** Risk of cerebrovascular event following neck radiotherapy using a multivariable Cox regression model for those without advanced disease\*

| Variable             | HR (95% CI)      | Chi-square | P      |
|----------------------|------------------|------------|--------|
| Statin use           | 0.40 (0.20–0.79) | 6.93       | 0.008  |
| Age                  | 1.05 (1.03–1.07) | 25.46      | <0.001 |
| Male sex             | 1.09 (0.69–1.74) | 0.14       | 0.707  |
| Hypertension         | 1.26 (0.79–1.99) | 0.96       | 0.328  |
| Diabetes             | 1.01 (0.51–2.01) | <0.01      | 0.981  |
| Prior CAD            | 1.26 (0.59–2.71) | 0.35       | 0.555  |
| Prior CVE            | 1.78 (0.80–3.94) | 1.99       | 0.158  |
| Dyslipidemia         | 0.76 (0.40–1.45) | 0.69       | 0.405  |
| Smoking <sup>†</sup> | 1.32 (0.98–1.80) | 3.26       | 0.071  |

HR, hazard ratio; CI, confidence interval; CAD, coronary artery disease; CVE, cerebrovascular event.

\*Advanced disease: stage IV cancer; <sup>†</sup>Smoking: active or prior smoking.
